# Supplementary material
Source: Springer Nature journal article supplement (https://www.springermedizin.de/resource/supplementary/12885_2010_2260_MOESM4_ESM.pdf/9460878)

**A**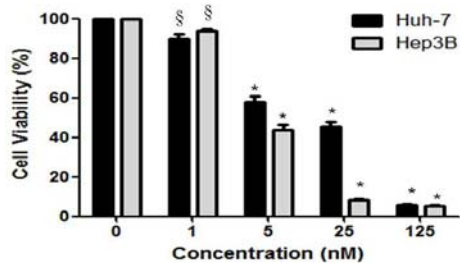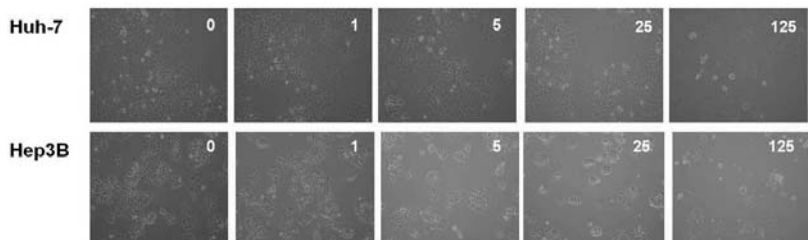**B**

AZD1152-HQPA for 24 hours

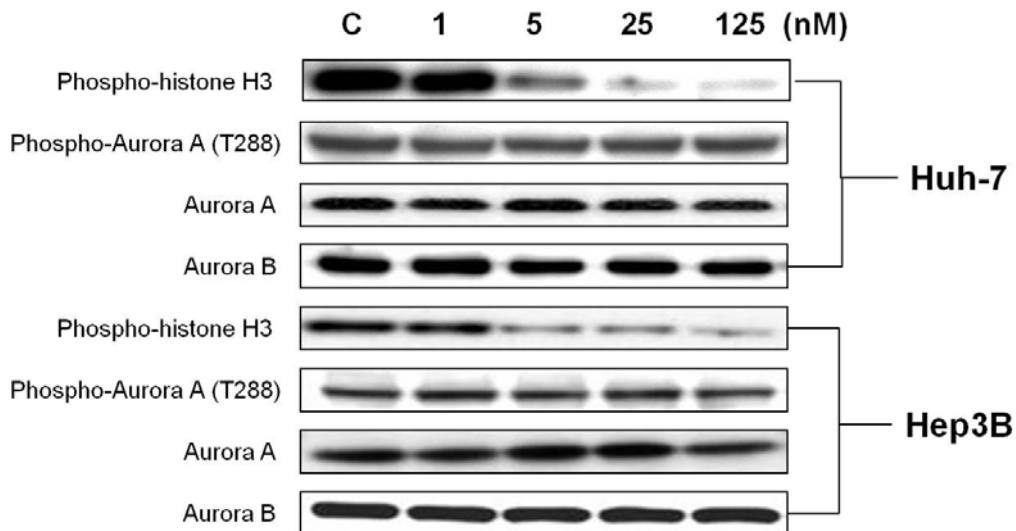

Supplement: MOESM4 [file 9460878]
